# Supplementary material for: Identifying Diagnoses of Schizophrenia Spectrum Disorder in Large Data Sets
Source: Atypon-hosted journal article supplement (doi:10.1176/appi.ps.202100696), 2022-04-20
Supplement: appi.ps.202100696.ds001.pdf [file appi.ps.202100696.ds001.pdf]

## Identifying Diagnoses of Schizophrenia Spectrum Disorder in Large Datasets

### *Supplementary Appendix*

- Table S1.** ICD-9 and ICD-10 codes included in the definition of a schizophrenia spectrum disorder diagnosis for main and sensitivity analyses  
p. 2
- Figure S1.** Among patients with an index schizophrenia spectrum disorder diagnosis in 2016, proportion of patients without 12, 24, 36, or 48 months of complete enrollment data preceding the index diagnosis, by age group and sex  
p. 3
- Table S2.** Patients with an index schizophrenia spectrum disorder diagnosis in 2016 and their enrollment data availability in the 12, 24, 36, or 48 months preceding the index diagnosis, by age group and sex  
p. 4
- Table S3.** Distribution of insurance gaps among patients with an index schizophrenia spectrum disorder diagnosis in 2016, during the 48 months preceding the index diagnosis  
p. 5
- Table S4.** Characteristics associated with having complete historical data during the 48 months preceding the index schizophrenia spectrum disorder diagnosis (vs. not having complete data)  
p. 6
- Table S5.** Proportion with one or more health insurance types or payers during the index month and 48 months preceding the index schizophrenia spectrum disorder diagnosis, by insurance type at time of index diagnosis  
p. 7
- Table S6.** Patients with an index schizophrenia spectrum disorder diagnosis in 2016 and 48 months of complete historical data, with schizophrenia spectrum disorder diagnosis history in the 12, 24, 36, or 48 preceding months, by age group and sex  
p. 8
- Table S7.** Rate of new schizophrenia spectrum disorder diagnosis in 2016 (number of patients per 100,000 members available in MA APCD), by age group and sex  
p. 9
- Table S8.** Rate of new schizophrenia spectrum disorder diagnosis in 2016 (number of patients per 100,000 members available in MA APCD), by age group and sex (for those with a single health insurance payer during index diagnosis and prior 48 months only)  
p. 10
- Table S9.** Patients with an index schizophrenia spectrum disorder diagnosis in 2016 and 48 months of complete historical data, with schizophrenia spectrum disorder diagnosis history in the 12, 24, 36, or 48 preceding months, by age group and sex (sensitivity analysis: historical diagnoses from an in an expanded set of claim lines)  
p. 11
- Table S10.** Patients with an index schizophrenia spectrum disorder diagnosis in 2016 and 48 months of complete historical data, with schizophrenia spectrum disorder diagnosis history in the 12, 24, 36, or 48 preceding months, by age group and sex (sensitivity analysis: including other and unspecified psychosis diagnosis codes)  
p. 12
- Table S11.** Antipsychotic medication prescriptions prior to the index schizophrenia spectrum disorder diagnosis in 2016 for patients with complete historical data and without a historical schizophrenia spectrum diagnosis, by age group and sex  
p. 13

**Table S1.** ICD-9 and ICD-10 codes included in the definition of a schizophrenia spectrum disorder diagnosis for main and sensitivity analyses

| <b>Diagnosis category</b>                                              | <b>ICD-9 codes</b>                                                                          | <b>ICD-10 codes</b>                                                                                                                                                                                             |
|------------------------------------------------------------------------|---------------------------------------------------------------------------------------------|-----------------------------------------------------------------------------------------------------------------------------------------------------------------------------------------------------------------|
| Schizophrenia                                                          | 295.X <u>excl.</u> 295.7X Schizophrenic disorders, <u>excl.</u><br>Schizoaffective disorder | F20.X Schizophrenia                                                                                                                                                                                             |
| Schizoaffective disorder                                               | 295.7X Schizoaffective disorder                                                             | F25.X Schizoaffective disorder                                                                                                                                                                                  |
| <i>For sensitivity analysis:</i><br>Other and unspecified<br>psychosis | 298.8 Other and unspecified reactive psychosis<br>298.9 Unspecified psychosis               | F23 Brief psychotic disorder<br>F28 Other psychotic disorder not due to a substance or known<br>physiological condition<br>F29 Unspecified psychosis not due to a substance or known physiological<br>condition |

Notes: (1) ICD-9 codes were based on [Simon et al. \(2017\)](#), [Kuhl et al. \(2016\)](#). (2) ICD-9 to ICD-10 codes conversions were partially based on a [crosswalk](#) developed by the CMS and processed by the NBER.

**Figure S1.** Among patients with an index schizophrenia spectrum disorder diagnosis in 2016, proportion of patients without 12, 24, 36, or 48 months of complete enrollment data preceding the index diagnosis, by age group and sex

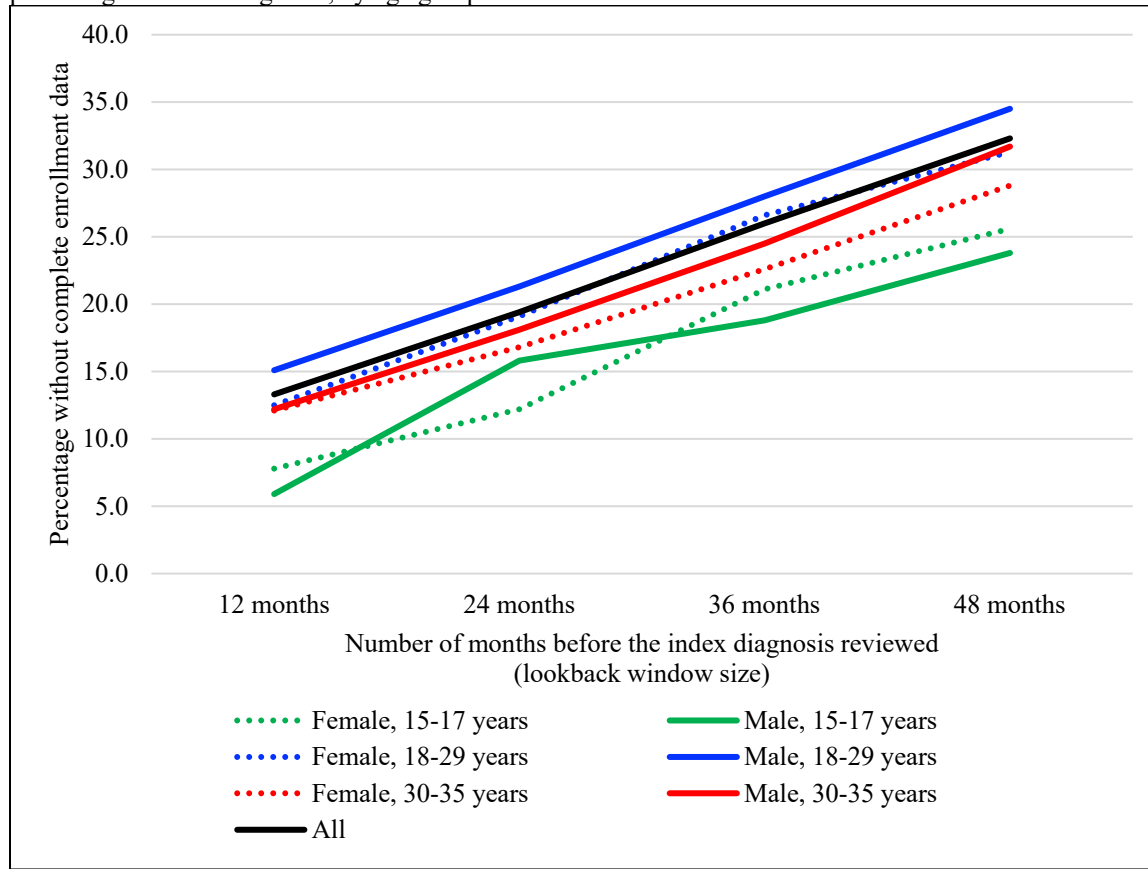

Note: Age grouping at time of index diagnosis.

**Table S2.** Patients with an index schizophrenia spectrum disorder diagnosis in 2016 and their enrollment data availability in the 12, 24, 36, or 48 months preceding the index diagnosis, by age group and sex

|                     | N of patients with an index diagnosis in 2016 [A] | Among [A], percentage of patients without X months of complete enrollment data preceding the index diagnosis |      |      |      |
|---------------------|---------------------------------------------------|--------------------------------------------------------------------------------------------------------------|------|------|------|
|                     |                                                   | X=12                                                                                                         | X=24 | X=36 | X=48 |
| Female, 15-17 years | 90                                                | 7.8                                                                                                          | 12.2 | 21.1 | 25.6 |
| Male, 15-17 years   | 101                                               | 5.9                                                                                                          | 15.8 | 18.8 | 23.8 |
| Female, 18-29 years | 1,161                                             | 12.5                                                                                                         | 19.1 | 26.6 | 31.3 |
| Male, 18-29 years   | 3,110                                             | 15.1                                                                                                         | 21.3 | 28.0 | 34.5 |
| Female, 30-35 years | 858                                               | 12.1                                                                                                         | 16.8 | 22.6 | 28.8 |
| Male, 30-35 years   | 1,897                                             | 12.2                                                                                                         | 18.1 | 24.5 | 31.7 |
| All                 | 7,217                                             | 13.3                                                                                                         | 19.4 | 26.0 | 32.3 |

**Table S3.** Distribution of insurance gaps among patients with an index schizophrenia spectrum disorder diagnosis in 2016, during the 48 months preceding the index diagnosis

| N of gaps                                                                                              | N of patients with an index diagnosis in 2016 (column percentage) | Total gap month(s), cell percentage (N = 7,217) |     |     |     |     |     |     |     |     |     |     |     |     |       |       |       | Total enrollment month(s) |        |                      |
|--------------------------------------------------------------------------------------------------------|-------------------------------------------------------------------|-------------------------------------------------|-----|-----|-----|-----|-----|-----|-----|-----|-----|-----|-----|-----|-------|-------|-------|---------------------------|--------|----------------------|
|                                                                                                        |                                                                   | 0                                               | 1   | 2   | 3   | 4   | 5   | 6   | 7   | 8   | 9   | 10  | 11  | 12  | 13-24 | 25-36 | 37-47 | Mean                      | Median | Inter-quartile range |
| No enrollment data during the preceding 48 months                                                      | 79 (1.1)                                                          | 1.1                                             | /   | /   | /   | /   | /   | /   | /   | /   | /   | /   | /   | /   | /     | /     | /     | /                         | /      | /                    |
| No gap: 48 months of continuous enrollment data                                                        | 4,885 (67.7)                                                      | 12.6                                            | /   | /   | /   | /   | /   | /   | /   | /   | /   | /   | /   | /   | /     | /     | /     | 48.0                      | 48.0   | 0.0                  |
| No gap: continuous enrollment data immediately preceding the first diagnosis, but fewer than 48 months | 906 (12.6)                                                        | 67.7                                            | /   | /   | /   | /   | /   | /   | /   | /   | /   | /   | /   | /   | /     | /     | /     | 23.9                      | 25.0   | 29.0                 |
| One gap                                                                                                | 1,052 (14.6)                                                      | /                                               | 3.5 | 1.8 | 1.2 | 1.0 | 0.7 | 0.8 | 0.5 | 0.5 | 0.5 | 0.4 | 0.4 | 0.4 | 1.9   | 0.6   | 0.3   | 37.1                      | 41.0   | 14.0                 |
| Two gaps                                                                                               | 269 (3.7)                                                         | /                                               | /   | 0.3 | 0.3 | 0.4 | 0.2 | 0.1 | 0.2 | 0.2 | 0.1 | 0.1 | 0.2 | 0.2 | 1.1   | 0.2   | 0.0   | 35.4                      | 37.0   | 14.0                 |
| Three gaps                                                                                             | 22 (0.3)                                                          | /                                               | /   | /   | 0.0 | 0.0 | 0.0 | 0.0 | 0.0 | 0.0 | 0.0 | 0.0 | 0.0 | 0.0 | 0.1   | 0.0   | 0.0   | 33.1                      | 35.0   | 10.0                 |
| Four gaps                                                                                              | 4 (0.1)                                                           | /                                               | /   | /   | /   | 0.0 | 0.0 | 0.0 | 0.0 | 0.0 | 0.0 | 0.0 | 0.0 | 0.0 | 0.0   | 0.0   | 0.0   | 34.3                      | 33.5   | 2.5                  |

Note: No patient found with more than four gaps.

**Table S4.** Characteristics associated with having complete historical data during the 48 months preceding the index schizophrenia spectrum disorder diagnosis (vs. not having complete data)

| <b>Characteristic</b>                                         | <b>Odds Ratio (95% CI)</b> |
|---------------------------------------------------------------|----------------------------|
| Female                                                        | <b>1.13 (1.01, 1.27)</b>   |
| Ages (reference group: Ages 18-29 years):                     |                            |
| 15-17 years                                                   | <b>1.55 (1.10, 2.17)</b>   |
| 30-35 years                                                   | 1.08 (0.97, 1.20)          |
| Index diagnosis location (reference group: ED/observational): |                            |
| Inpatient, psychiatry                                         | <b>0.77 (0.61, 0.98)</b>   |
| Inpatient, non-psychiatry                                     | 1.07 (0.85, 1.35)          |
| Outpatient, mental health                                     | <b>1.27 (1.11, 1.45)</b>   |
| Outpatient, primary care                                      | 1.15 (0.97, 1.36)          |
| Outpatient, other                                             | <b>1.78 (1.47, 2.15)</b>   |
| Index diagnosis insurance (reference group: Medicaid):        |                            |
| Commercial                                                    | 0.99 (0.85, 1.15)          |
| Other                                                         | <b>0.60 (0.49, 0.72)</b>   |
| Residence in a low SES zip code at time of index diagnosis    | 0.93 (0.82, 1.05)          |
| Index diagnosis (reference group: schizophrenia)              |                            |
| Schizoaffective disorder                                      | <b>1.11 (1.00, 1.23)</b>   |
| Both                                                          | <b>0.67 (0.47, 0.95)</b>   |

Notes: Displays the odds ratios for characteristics associated with having 48 months of data prior to the index schizophrenia spectrum disorder diagnosis based on a logistic model. Including patients with an index spectrum disorder diagnosis in 2016 (N = 7,217). CI = confidence interval; ED = emergency department; SES = socioeconomic status.

**Table S5.** Proportion with one or more health insurance types or payers during the index month and 48 months preceding the index schizophrenia spectrum disorder diagnosis, by insurance type at time of index diagnosis

|                          | Medicaid | Commercial | Other | All   |
|--------------------------|----------|------------|-------|-------|
| N                        | 3,948    | 674        | 263   | 4,885 |
| Health insurance types:  |          |            |       |       |
| One                      | 59.6     | 52.8       | 30.4  | 57.1  |
| Two                      | 31.8     | 33.4       | 56.3  | 33.3  |
| Three                    | 8.7      | 13.8       | 13.3  | 9.6   |
| Health insurance payers: |          |            |       |       |
| One                      | 38.4     | 33.8       | 18.6  | 36.7  |
| Two                      | 29.3     | 30.1       | 28.1  | 29.3  |
| Three                    | 19.4     | 20.5       | 37.6  | 20.5  |
| More than three          | 12.9     | 15.6       | 15.7  | 13.5  |

Notes: Index diagnoses refer the initial schizophrenia spectrum disorder diagnosis during the 2016 observation period. All subjects in the table must have complete historical data, defined as having 48 continuous months of data prior to the index diagnosis month. Insurance types include Medicaid, commercial, and other (Medicare Advantage, mixed, unspecified, missing, etc.). Insurance payers include individual health insurance companies, fee-for-service Medicaid, or Health Safety Net. If a health insurance company operated in multiple insurance types (such as commercial, Medicaid managed care, and/or other including Medicare Advantage), then each insurance type of this health insurance company was counted as a different payer.

**Table S6.** Patients with an index schizophrenia spectrum disorder diagnosis in 2016 and 48 months of complete historical data, with schizophrenia spectrum disorder diagnosis history in the 12, 24, 36, or 48 preceding months, by age group and sex

|                     | N of patients with an index diagnosis in 2016 [A] | Among [A], N of patients with 48 months of historical data [B] | Percentage of [B] among [A] | Among [B], percentage of patients with a historical diagnosis during the X months preceding the index diagnosis |      |      |      |
|---------------------|---------------------------------------------------|----------------------------------------------------------------|-----------------------------|-----------------------------------------------------------------------------------------------------------------|------|------|------|
|                     |                                                   |                                                                |                             | X=12                                                                                                            | X=24 | X=36 | X=48 |
| Female, 15-17 years | 90                                                | 67                                                             | 74.4                        | 31.3                                                                                                            | 38.8 | 44.8 | 44.8 |
| Male, 15-17 years   | 101                                               | 77                                                             | 76.2                        | 29.9                                                                                                            | 37.7 | 40.3 | 40.3 |
| Female, 18-29 years | 1,161                                             | 798                                                            | 68.7                        | 53.1                                                                                                            | 63.3 | 67.3 | 70.1 |
| Male, 18-29 years   | 3,110                                             | 2,037                                                          | 65.5                        | 59.9                                                                                                            | 69.9 | 73.8 | 75.9 |
| Female, 30-35 years | 858                                               | 611                                                            | 71.2                        | 60.7                                                                                                            | 71.5 | 74.8 | 77.6 |
| Male, 30-35 years   | 1,897                                             | 1,295                                                          | 68.3                        | 69.3                                                                                                            | 79.2 | 83.6 | 85.6 |
| All                 | 7,217                                             | 4,885                                                          | 67.7                        | 60.6                                                                                                            | 70.5 | 74.5 | 76.7 |



**Table S7.** Rate of new schizophrenia spectrum disorder diagnosis in 2016 (number of patients per 100,000 members available in MA APCD), by age group and sex

|                     | Number of members available in MA APCD in 2016 | Number of patients with:                                                                                                                                                                                                                                                                                                     |                   |                   |                   | Number of patients per 100,000 members available in MA APCD |          |          |          |
|---------------------|------------------------------------------------|------------------------------------------------------------------------------------------------------------------------------------------------------------------------------------------------------------------------------------------------------------------------------------------------------------------------------|-------------------|-------------------|-------------------|-------------------------------------------------------------|----------|----------|----------|
|                     |                                                | Column A:<br>X=12                                                                                                                                                                                                                                                                                                            | Column B:<br>X=24 | Column C:<br>X=36 | Column D:<br>X=48 | Column A                                                    | Column B | Column C | Column D |
|                     |                                                | <ul style="list-style-type: none"> <li>• an index schizophrenia spectrum disorder diagnosis in 2016, and</li> <li>• 48 months of complete historical data preceding the index diagnosis, and</li> <li>• no historical schizophrenia spectrum disorder diagnosis during the X months preceding the index diagnosis</li> </ul> |                   |                   |                   |                                                             |          |          |          |
| Female, 15-17 years | 100,204                                        | 46                                                                                                                                                                                                                                                                                                                           | 41                | 37                | 37                | 46                                                          | 41       | 37       | 37       |
| Male, 15-17 years   | 104,612                                        | 54                                                                                                                                                                                                                                                                                                                           | 48                | 46                | 46                | 52                                                          | 46       | 44       | 44       |
| Female, 18-29 years | 530,582                                        | 374                                                                                                                                                                                                                                                                                                                          | 293               | 261               | 239               | 70                                                          | 55       | 49       | 45       |
| Male, 18-29 years   | 492,974                                        | 816                                                                                                                                                                                                                                                                                                                          | 614               | 533               | 491               | 166                                                         | 125      | 108      | 100      |
| Female, 30-35 years | 255,276                                        | 240                                                                                                                                                                                                                                                                                                                          | 174               | 154               | 137               | 94                                                          | 68       | 60       | 54       |
| Male, 30-35 years   | 233,699                                        | 397                                                                                                                                                                                                                                                                                                                          | 269               | 213               | 186               | 170                                                         | 115      | 91       | 80       |
| All                 | 1,717,347                                      | 1,927                                                                                                                                                                                                                                                                                                                        | 1,439             | 1,244             | 1,136             | 112                                                         | 84       | 72       | 66       |

Notes: Members available in MA APCD in 2016 including all members with at least one month of enrollment data in 2016; age determined in December 2016. MA APCD = Massachusetts All-Payer Claims Database.

**Table S8.** Rate of new schizophrenia spectrum disorder diagnosis in 2016 (number of patients per 100,000 members available in MA APCD), by age group and sex (for those with a single health insurance payer during index diagnosis and prior 48 months only)

|                     | Number of members available in MA APCD in 2016 | Number of patients with:                                                                                                                                                                                                                                                                                                                                                                                                |                   |                   |                   | Number of patients per 100,000 members available in MA APCD |          |          |          |
|---------------------|------------------------------------------------|-------------------------------------------------------------------------------------------------------------------------------------------------------------------------------------------------------------------------------------------------------------------------------------------------------------------------------------------------------------------------------------------------------------------------|-------------------|-------------------|-------------------|-------------------------------------------------------------|----------|----------|----------|
|                     |                                                | Column A:<br>X=12                                                                                                                                                                                                                                                                                                                                                                                                       | Column B:<br>X=24 | Column C:<br>X=36 | Column D:<br>X=48 | Column A                                                    | Column B | Column C | Column D |
|                     |                                                | <ul style="list-style-type: none"> <li>• an index schizophrenia spectrum disorder diagnosis in 2016, and</li> <li>• 48 months of complete historical data preceding the index diagnosis, and</li> <li>• no historical schizophrenia spectrum disorder diagnosis during the X months preceding the index diagnosis, and</li> <li>• a single health insurance payer during index diagnosis and prior 48 months</li> </ul> |                   |                   |                   |                                                             |          |          |          |
| Female, 15-17 years | 100,204                                        | 15                                                                                                                                                                                                                                                                                                                                                                                                                      | 15                | 15                | 15                | 15                                                          | 15       | 15       | 15       |
| Male, 15-17 years   | 104,612                                        | 17                                                                                                                                                                                                                                                                                                                                                                                                                      | 17                | 17                | 17                | 16                                                          | 16       | 16       | 16       |
| Female, 18-29 years | 530,582                                        | 113                                                                                                                                                                                                                                                                                                                                                                                                                     | 84                | 77                | 67                | 21                                                          | 16       | 15       | 13       |
| Male, 18-29 years   | 492,974                                        | 280                                                                                                                                                                                                                                                                                                                                                                                                                     | 218               | 188               | 171               | 57                                                          | 44       | 38       | 35       |
| Female, 30-35 years | 255,276                                        | 89                                                                                                                                                                                                                                                                                                                                                                                                                      | 58                | 52                | 44                | 35                                                          | 23       | 20       | 17       |
| Male, 30-35 years   | 233,699                                        | 180                                                                                                                                                                                                                                                                                                                                                                                                                     | 111               | 81                | 70                | 77                                                          | 47       | 35       | 30       |
| All                 | 1,717,347                                      | 694                                                                                                                                                                                                                                                                                                                                                                                                                     | 503               | 430               | 384               | 40                                                          | 29       | 25       | 22       |

Notes: Index diagnoses refer the initial schizophrenia spectrum disorder diagnosis during the 2016 observation period. All subjects in the table must have complete historical data, defined as having 48 continuous months of data prior to the index diagnosis month. Insurance types include Medicaid, commercial, and other (Medicare Advantage, mixed, unspecified, missing, etc.). Insurance payers include individual health insurance companies, fee-for-service Medicaid, or Health Safety Net. If a health insurance company operated in multiple insurance types (such as commercial, Medicaid managed care, and/or other including Medicare Advantage), then each insurance type of this health insurance company was counted as a different payer. MA APCD = Massachusetts All-Payer Claims Database.

**Table S9.** Patients with an index schizophrenia spectrum disorder diagnosis in 2016 and 48 months of complete historical data, with schizophrenia spectrum disorder diagnosis history in the 12, 24, 36, or 48 preceding months, by age group and sex (sensitivity analysis: historical diagnoses from an in an expanded set of claim lines)

|                     | N of patients with an index diagnosis in 2016 [A] | Among [A], N of patients with 48 months of historical data [B] | Percentage of [B] among [A] | Among [B], percentage of patients with a historical diagnosis during the X months preceding the index diagnosis |      |      |      |
|---------------------|---------------------------------------------------|----------------------------------------------------------------|-----------------------------|-----------------------------------------------------------------------------------------------------------------|------|------|------|
|                     |                                                   |                                                                |                             | X=12                                                                                                            | X=24 | X=36 | X=48 |
| Female, 15-17 years | 90                                                | 67                                                             | 74.4                        | 35.8                                                                                                            | 43.3 | 47.8 | 47.8 |
| Male, 15-17 years   | 101                                               | 77                                                             | 76.2                        | 33.8                                                                                                            | 40.3 | 42.9 | 42.9 |
| Female, 18-29 years | 1,161                                             | 798                                                            | 68.7                        | 58.6                                                                                                            | 67.5 | 71.2 | 73.4 |
| Male, 18-29 years   | 3,110                                             | 2,037                                                          | 65.5                        | 65.3                                                                                                            | 73.4 | 76.8 | 78.5 |
| Female, 30-35 years | 858                                               | 611                                                            | 71.2                        | 65.3                                                                                                            | 74.0 | 76.9 | 79.2 |
| Male, 30-35 years   | 1,897                                             | 1,295                                                          | 68.3                        | 75.4                                                                                                            | 82.6 | 86.3 | 87.6 |
| All                 | 7,217                                             | 4,885                                                          | 67.7                        | 66.0                                                                                                            | 74.0 | 77.5 | 79.2 |

Notes: Historical diagnoses from an expanded set of claim lines compared to the main analysis (including post-acute care, ambulatory, laboratory, etc., in addition to inpatient, ED/observational, and outpatient claims lines); ED = emergency department.

**Table S10.** Patients with an index schizophrenia spectrum disorder diagnosis in 2016 and 48 months of complete historical data, with schizophrenia spectrum disorder diagnosis history in the 12, 24, 36, or 48 preceding months, by age group and sex (sensitivity analysis: including other and unspecified psychosis diagnosis codes)

|                     | N of patients with an index diagnosis in 2016 [A] | Among [A], N of patients with 48 months of historical data [B] | Percentage of [B] among [A] | Among [B], percentage of patients with a historical diagnosis during the X months preceding the index diagnosis |      |      |      |
|---------------------|---------------------------------------------------|----------------------------------------------------------------|-----------------------------|-----------------------------------------------------------------------------------------------------------------|------|------|------|
|                     |                                                   |                                                                |                             | X=12                                                                                                            | X=24 | X=36 | X=48 |
| Female, 15-17 years | 213                                               | 150                                                            | 70.4                        | 44.7                                                                                                            | 54.7 | 58.0 | 58.7 |
| Male, 15-17 years   | 241                                               | 184                                                            | 76.3                        | 33.2                                                                                                            | 41.8 | 45.7 | 46.7 |
| Female, 18-29 years | 1,731                                             | 1,151                                                          | 66.5                        | 50.1                                                                                                            | 60.7 | 64.6 | 66.6 |
| Male, 18-29 years   | 4,071                                             | 2,565                                                          | 63.0                        | 58.9                                                                                                            | 70.0 | 74.4 | 76.6 |
| Female, 30-35 years | 1,160                                             | 802                                                            | 69.1                        | 56.7                                                                                                            | 68.3 | 72.2 | 74.7 |
| Male, 30-35 years   | 2,254                                             | 1,476                                                          | 65.5                        | 67.6                                                                                                            | 78.4 | 82.5 | 84.6 |
| All                 | 9,670                                             | 6,328                                                          | 65.4                        | 58.0                                                                                                            | 68.9 | 73.0 | 75.1 |

**Table S11.** Antipsychotic medication prescriptions prior to the index schizophrenia spectrum disorder diagnosis in 2016 for patients with complete historical data and without a historical schizophrenia spectrum diagnosis, by age group and sex

|                     | N of patients with an index diagnosis in 2016 and 48 months of historical data [A] | Among [A], N of patients with no historical diagnosis during the 48 months preceding the index diagnosis [B] | Percentage of [B] among [A] | Among [B], percentage of patients with an antipsychotic medication prescription during the X months preceding the index diagnosis |      |      |      |
|---------------------|------------------------------------------------------------------------------------|--------------------------------------------------------------------------------------------------------------|-----------------------------|-----------------------------------------------------------------------------------------------------------------------------------|------|------|------|
|                     |                                                                                    |                                                                                                              |                             | X=12                                                                                                                              | X=24 | X=36 | X=48 |
| Female, 15-17 years | 67                                                                                 | 37                                                                                                           | 55.2                        | 62.2                                                                                                                              | 67.6 | 70.3 | 70.3 |
| Male, 15-17 years   | 77                                                                                 | 46                                                                                                           | 59.7                        | 43.5                                                                                                                              | 52.2 | 54.3 | 54.3 |
| Female, 18-29 years | 798                                                                                | 239                                                                                                          | 29.9                        | 59.0                                                                                                                              | 66.5 | 70.7 | 72.0 |
| Male, 18-29 years   | 2,037                                                                              | 491                                                                                                          | 24.1                        | 50.5                                                                                                                              | 58.9 | 63.3 | 65.4 |
| Female, 30-35 years | 611                                                                                | 137                                                                                                          | 22.4                        | 45.3                                                                                                                              | 53.3 | 55.5 | 59.1 |
| Male, 30-35 years   | 1,295                                                                              | 186                                                                                                          | 14.4                        | 47.8                                                                                                                              | 60.2 | 66.1 | 69.4 |
| All                 | 4,885                                                                              | 1,136                                                                                                        | 23.3                        | 51.3                                                                                                                              | 60.0 | 64.3 | 66.4 |
